# Supplementary material
Source: publisher figshare collection journal article supplement (https://sage.figshare.com/ndownloader/files/23581505)
Supplement: Supplementary file 1 [file 23581505]

## Supplemental Appendix

| Specialty Society                                                | Abbreviation |
|------------------------------------------------------------------|--------------|
| American Academy of Allergy Asthma & Immunology                  | AAAAI        |
| American Academy of Dermatology                                  | AAD          |
| American Academy of Family Physicians                            | AAFP         |
| American Academy of Neurology                                    | AAN          |
| American Association for the Study of Liver Diseases             | AASLD        |
| American College of Cardiology                                   | ACC          |
| American College of Chest Physicians + American Thoracic Society | ACCP-ATS     |
| American College of Emergency Physicians                         | ACEP         |
| The American College of Obstetricians and Gynecologists          | ACOG         |
| America College of Physicians                                    | ACP          |
| American College of Radiology                                    | ACR          |
| American College of Rheumatology                                 | ACRheum      |
| American Gastroenterological Association                         | AGA          |
| American Society of Clinical Oncology                            | ASCO         |
| American Society of Hematology                                   | ASH          |
| American Society of Nephrology                                   | ASN          |
| Endocrine Society                                                | ES           |
| Infectious Diseases Society of America                           | IDSA         |
| Critical Care Societies Collaborative - Critical Care            | SCCM         |
| Society of General Internal Medicine                             | SGIM         |
| Society of Hospital Medicine - Adult                             | SHM          |
